# Supplementary material
Source: publisher figshare collection journal article supplement (https://sage.figshare.com/ndownloader/files/20420649)

## Supplementary materials

**Supplementary Table 1. Clinical and treatment variables based on the use of ticagrelor versus clopidogrel or prasugrel**

|                              | Ticagrelor     | Clopidogrel or<br>Prasugrel | <i>P</i> -value |
|------------------------------|----------------|-----------------------------|-----------------|
| Pre-PCI treatment, n/N (%)   |                |                             |                 |
| Heparin                      | 98/290 (33.8)  | 117/240 (48.8)              | <.001           |
| Bivalirudin                  | 18/292 (6.2)   | 32/240 (13.3)               | .005            |
| GP IIb/IIIa inhibitors       | 49/262 (18.7)  | 55/201 (27.4)               | .027            |
| ST resolution, n/N (%)       | 191/253 (75.5) | 119/188 (63.3)              | .006            |
| Pre-PCI TIMI score, n/N (%)  |                |                             | .377            |
| TIMI 0                       | 182/292 (62.3) | 148/221 (67.0)              |                 |
| TIMI 1                       | 72/292 (24.7)  | 41/221 (18.6)               |                 |
| TIMI 2                       | 24/292 (8.2)   | 18/221 (8.1)                |                 |
| TIMI 3                       | 14/292 (4.8)   | 14/221 (6.3)                |                 |
| Post-PCI TIMI score, n/N (%) |                |                             | <.001           |
| TIMI 0                       | 5/263 (1.9)    | 13/201 (6.5)                |                 |
| TIMI 1                       | 3/263 (1.1)    | 2/201 (1.0)                 |                 |
| TIMI 2                       | 6/263 (2.3)    | 24/201 (11.9)               |                 |
| TIMI 3                       | 249/263 (94.7) | 162/201 (80.6)              |                 |
| Killip class, n/N (%)        |                |                             | .670            |
| I                            | 214/292 (73.3) | 166/240 (69.2)              |                 |
| II                           | 33/292 (11.3)  | 33/240 (13.8)               |                 |
| III                          | 19/292 (6.5)   | 20/240 (8.3)                |                 |

|                                                       |                |                |       |
|-------------------------------------------------------|----------------|----------------|-------|
| IV                                                    | 26/292 (8.9)   | 21/240 (8.8)   |       |
| Pre-PCI cardiac arrest, n/N (%)                       | 38/292 (13.0)  | 18/240 (7.5)   | .039  |
| Culprit artery, n/N (%)                               |                |                | 0.165 |
| Left main                                             | 10/261 (3.8)   | 5/197 (2.5)    |       |
| Left anterior descending                              | 122/261 (46.7) | 85/197 (43.1)  |       |
| Circumflex                                            | 42/261 (16.1)  | 26/197 (13.2)  |       |
| Right coronary                                        | 76/261 (29.1)  | 77/197 (39.1)  |       |
| Bypass                                                | 11/261 (4.2)   | 4/197 (2.0)    |       |
| Diabetes, n/N (%)                                     | 54/290 (18.6)  | 56/235 (23.8)  | .145  |
| Dyslipidemia, n/N (%)                                 | 105/289 (36.3) | 80/233 (34.3)  | .635  |
| Hypertension, n/N (%)                                 | 177/292 (60.6) | 171/240 (71.3) | .010  |
| Smoker, n/N(%)                                        | 135/292 (46.2) | 95/237 (40.1)  | .156  |
| Cardiovascular disease, n/N (%)                       | 26/290 (9.0)   | 30/235 (12.8)  | .161  |
| Number of vessels with<br>significant disease, n/N(%) |                |                | .440  |
| 0                                                     | 2/284          | 4/205          |       |
| 1                                                     | 105/284        | 70/205         |       |
| 2                                                     | 81/284         | 67/205         |       |
| 3                                                     | 96/284         | 64/205         |       |

---

Abbreviations: GP, glycoprotein; PCI, percutaneous coronary intervention; TIMI, Thrombolysis in Myocardial Infarction.

**Supplementary Table 2. Analysis of 90-day mortality with ticagrelor versus no ticagrelor by propensity score quintile**

|                                             | <b>Hazard ratio</b> | <b>95% CI</b> | <b><i>P</i>-value</b> |
|---------------------------------------------|---------------------|---------------|-----------------------|
| Ticagrelor (no vs yes)                      | 2.425               | 1.330–4.421   | .004                  |
| Propensity score group                      |                     |               |                       |
| 1 <sup>st</sup> vs 5 <sup>th</sup> quintile | 1.945               | .872–4.337    | .104                  |
| 2 <sup>nd</sup> vs 5 <sup>th</sup> quintile | 1.025               | .427–2.461    | .956                  |
| 3 <sup>rd</sup> vs 5 <sup>th</sup> quintile | .591                | .210–1.665    | .320                  |
| 4 <sup>th</sup> vs 5 <sup>th</sup> quintile | .486                | .162–1.453    | .196                  |

**Supplementary Figure 1.** Kaplan–Meier curves of (A) 10-day and (B) 30-day cumulative survival with ticagrelor (n = 219) versus no ticagrelor (n = 200), based on propensity score-matched data.

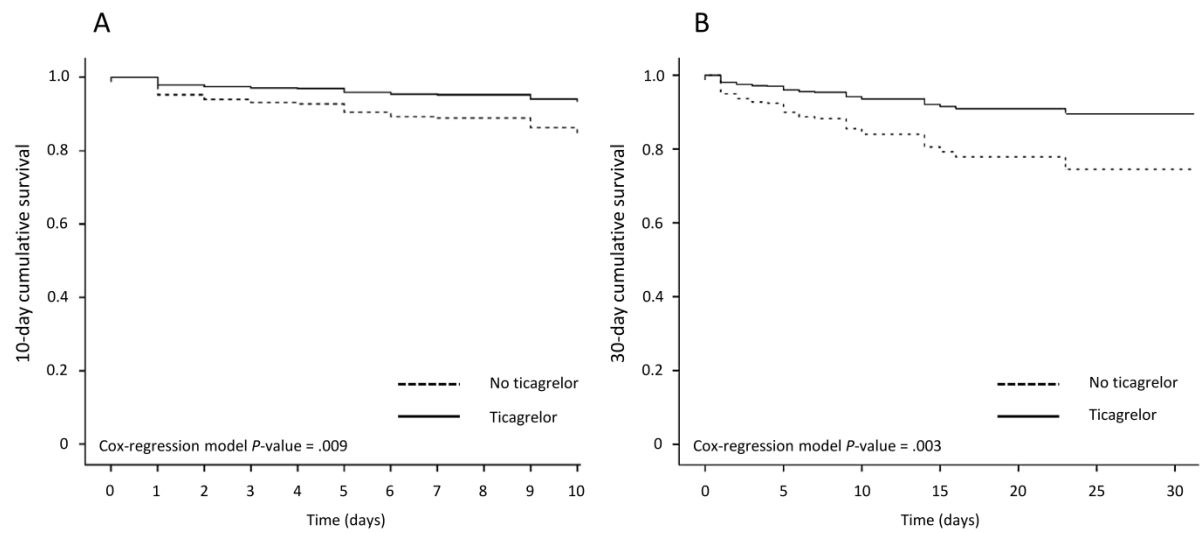

Supplement: Supplementary file 1 [file 20420649]
